# Supplementary material
Source: PubMed Central journal article supplement (PMC8488583)
Supplement: pnas.2023898118.sapp.pdf [file pnas.2023898118.sapp.pdf]

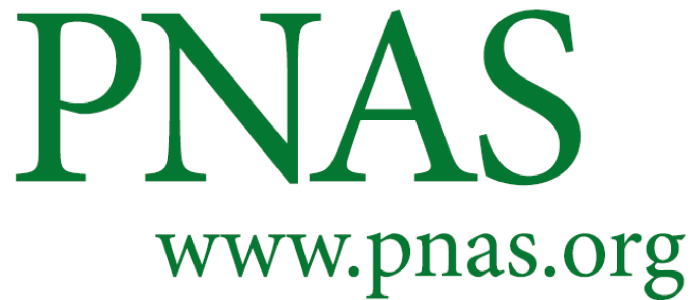

**Supplementary Information for**

**The Molecular Characterization of Antibody Binding to a Superantigen-like Protein from a Commensal Microbe**

Marta T. Borowska<sup>1\*</sup>, Christoph Drees<sup>2\*</sup>, Alexander E. Yarawsky<sup>4</sup>, Jeffrey J. Bunker<sup>2,5</sup>, Andrew B. Herr<sup>3,4,6</sup>, Albert Bendelac<sup>2,5</sup>, and Erin J. Adams<sup>1,5</sup>

\*These authors contributed equally to this work.

**Correspondence:** Erin J. Adams and Albert Bendelac

**Email:** [ejadams@uchicago.edu](mailto:ejadams@uchicago.edu) and [abendela@bsd.uchicago.edu](mailto:abendela@bsd.uchicago.edu)

**This part of PDF file includes:**

Extended methods

Figures S1 to S7

Tables S1 to S2

## **Extended methods**

### *Constructs*

For mouse Fab clones: variable domain of both heavy and k chains of mouse clones were amplified from plasmids provided by Albert Bendelac. Similarly, both chains of modified IgG constant domain amplified from plasmids gifted by Anthony Kossiakoff were fused with corresponding variable domains by overlap extension PCR. Both chains were cloned with sequence and ligation independent (SLIC) method in a pACgp67a vector with a 3C protease sequence, either basic or acid zippers and a C-terminal 6x histidine tag.

Human Fab clones were obtained and unmodified from Patrick Wilson and were not modified. Full length and truncated lbp plasmids were obtained from Albert Bendelac. Individual domains were cloned from these plasmids into pET301b with N-terminal 6x histidine tag. For alanine scanning mutagenesis, contacting residues were selected based on PISA analysis of lbp-VH5 Fab structure. Alanine mutants were introduced by quickchange mutagenesis using most common alanine codons.

### *Proteins expression and purification*

Baculoviruses with all hybrid mouse Fab chains were prepared by transfecting and amplifying into Sf9 cells. Mouse Fabs were expressed in the Hi5 cells by co-infecting with baculoviruses containing both chains and incubating up to 3 days. Fabs were purified from the supernatant using Ni-NTA agarose in buffer A, followed by overnight 4°C cleavage with protease 3C. On the next day, digested sample was passed through a second Ni-NTA subtractive step, where flow-through was collected, concentrated on Amicon 30-kDa MWCO (Millipore) and injected on size exclusion chromatography (Superdex 200 10/300 GL, GE Healthcare).

Human Fabs were transfected into suspension Expi293 cells (ThermoFisher) using Expifectamine and according to manufacturer's protocol. Supernatant was harvested after 5 days, spun down for 15min at 4°C /3,000 xg and incubated overnight with 1mL bed volume (bv) Ni-NTA agarose in buffer A with final concentration (f.c.) 20mM imidazole, pH 7.2. The next day the column was washed with high salt buffer A supplemented with 20 mM imidazole, then eluted in 5mL of buffer A with 350mM imidazole. Samples were further purified by size exclusion chromatography (Superdex 200 10/300 GL, GE Healthcare) in buffer A and single peak fraction was used for binding studies or concentrated for AUC studies using in 30-kDa MWCO Amicon Ultra centrifugal filter (Millipore). Both wild-type and alanine mutants of all lbp constructs were expressed in the same way. DNA constructs were heat shock transformed into E. coli BL21(DE3)pLysS and single colony was used to inoculate 25mL terrific broth (TB) starter culture supplemented with ampicillin, grown overnight at 37°C and 250 rpm shaking. 1L TB/Amp culture was inoculated with 1% of starter culture, induced

with 1mM IPTG at OD600 and continued to grow for 4hrs/ 37°C with 250rpm. Cells were harvested by centrifugation and resuspended in 50 ml buffer A with high salt (10 mM Hepes pH 7.2, 500 mM NaCl supplemented with 1 mM PMSF and 2 mM DNase I). Cells were lysed by passing three times through a high-pressure microfluidizer (Avastin), soluble fraction was collected by centrifugation for 40 min at 4°C /18,500 xg and 2mL bv Ni-NTA beads, f.c. 20mM imidazole 7.2 were added for overnight incubation. Next day after washing the column with high salt buffer A supplemented with 20 mM imidazole, protein was eluted in buffer A with 10 column volume (c.v.) 350mM imidazole. Typically, the protein was further purified by size exclusion chromatography (Superdex 200 10/300 GL, GE Healthcare) in buffer A. Peak fractions were pooled and concentrated to 5 mg/ml in a 3-kDa or 30-kDa MWCO Amicon Ultra centrifugal filter (Millipore).

Protein concentrations were determined by A280 using a calculated extinction coefficient. Purified lbpA constructs were mixed with 1.2-fold molar excess of smaller component and separated from excess by size exclusion chromatography (Superdex 200 10/300 GL, GE Healthcare) in buffer A. Peak fractions were pooled, concentrated in a 50-kDa MWCO Amicon Ultra centrifugal filter (Millipore), large aggregates were removed by 0.22um spin filter columns, and either used immediately for crystallization or stored at 4°C for up to a month.

#### *PBMC and splenic B cell isolation*

Peripheral blood was diluted 1:1 with 1x PBS, overlaid on Ficoll-Paque PLUS density gradient media (GE Healthcare) and centrifuged at room temperature for 30 min and 400 xg with low brakes. Mononuclear cells were harvested from interlayer and washed with PBS before flow cytometry staining. Whole blood was obtained from healthy volunteers with approval from the University of Chicago Institutional Review Board.

For isolation of mouse B cells, single cell suspensions were prepared by grinding spleens from C57BL/6 mice between glass slides. Cell suspension in HBSS, 0.25% BSA were next filtered through 70 um cell strainers (Fisher). Cells were pelleted by 5 min centrifugation at 400 xg, resuspended in 1x RBC lysis buffer (ebioscience) and incubated for 5 min on ice for RBC lysis. To purify untouched mouse B cells, cells were incubated with anti-mouse CD43 (S7) and MACS purified using Streptavidin MicroBeads (Miltenyi) and autoMACS Separator with a purity of ≥90%.

#### *lbp labeling and lymphocyte flow cytometry staining*

Recombinant lbp protein solutions were buffer exchanged using Zeba™ Spin Desalting Columns (Fisher) and eluted in 1x PBS before labeling with Alexa Fluor 488 and Alexa Fluor 647 using

commercially available Alexa Fluor labeling kits (Fisher). Ibp concentration after labeling was measured by Nanodrop.

For flow cytometry staining, human and mouse B cells were first incubated with Zombie dye life/dead stain (BioLegend) and either Human TruStain FcX Fc Receptor Blocking solution (Biolegend) or anti-mouse CD16/CD32 (Fisher). Next, cells were labeled for 20 min at 4°C to 8°C with Ibp at typically 10 – 100 ng/ml or as indicated in figures or text. After washing with HBSS, 0.25% BSA, cells were incubated with fluorophore conjugated mAbs purchased from Biolegend, eBioscience and BD: anti-mouse CD19 (1D3), anti-human CD19 (HIB1) and antimouse IgM (II/41) for 20 min at 4°C to 8°C. Cells were washed again, resuspended in HBSS, 0.25% BSA and analyzed using a LSR II cytometer (BD).

#### *Calcium-flux analysis*

Murine splenocytes and PBMCs were resuspended at a concentration of  $10 \times 10^6$  –  $15 \times 10^6$  cells/ml in HBSS with 6 micromolar Fura Red™ AM (Thermo Fisher) and 0.01% Pluronic F-127 (Thermo Fisher) and incubated for 30 min in a 37° C water bath. After washing with HBSS, splenocytes were stained with anti-mouse CD16/CD32 (Thermo Fisher) and anti-mouse CD19 (1D3) for 5 – 10 min at room temperature. PBMCs were stained with Human FcX Fc Receptor Blocking solution (Biolegend) and anti-human CD19 (clone: HIB1). Cells were equilibrated in a 37°C water bath for at least 10 minutes before stimulation. 10x DAPI was added right before cell acquisition and unstimulated cells were recorded for 20-30 seconds at a threshold rate of 5000 cells per second using a LSR II flow cytometer (BD). Indicated stimuli were prepared at a 10x final concentration in HBSS (final concentration was 10 microgram/ml for all stimuli if not indicated otherwise), added to the cell suspension and samples were recorded for additional 3-5 minutes. Ratiometric calcium flux was calculated with FlowJo (BD) and the Kinetics tool.

#### *Statistical analysis*

Statistical analysis by unpaired student's t test or as indicated in the figure legends was performed using GraphPad Prism 6.

## Supplementary Figures and Tables

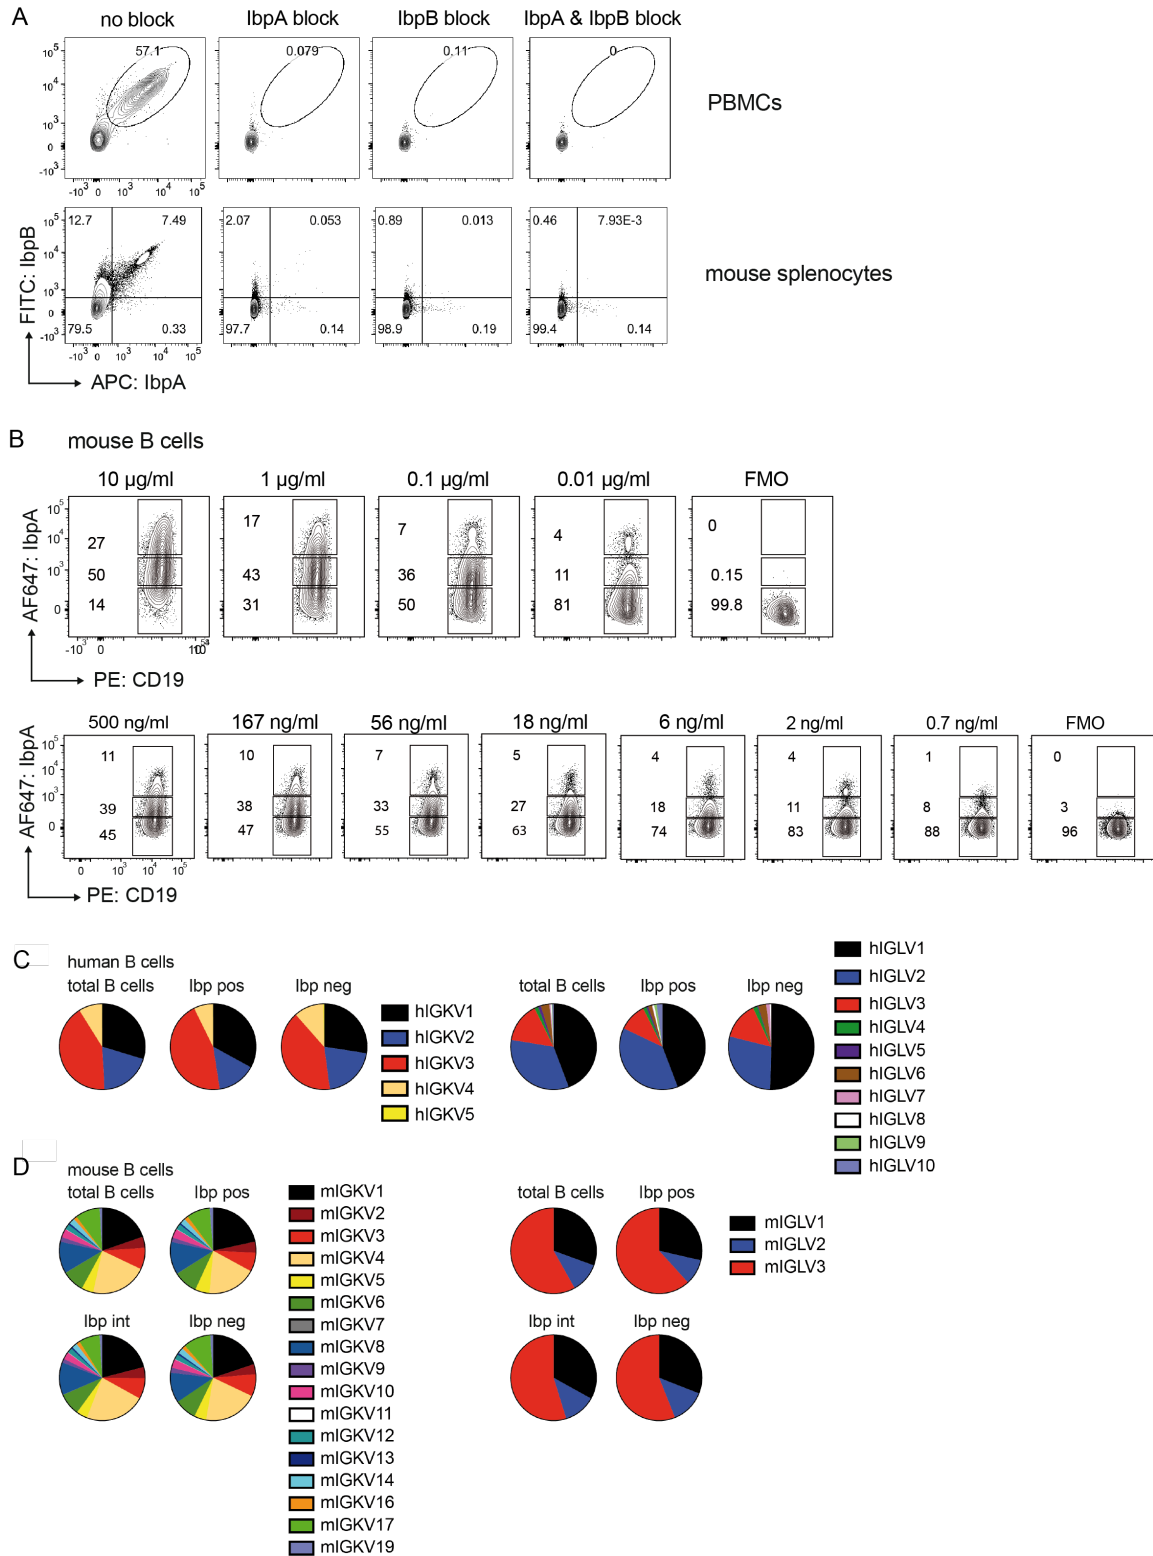

**Supplement Figure 1.** (A) Blocking studies using 15ug/mL of block either lbpA, lbpB or both, followed by staining with 60ng/mL of lbpA and lbpB. (B) Representative contour plots show lbpA titrations using wild-type mouse B cells. Pre-gates were drawn on CD19pos splenocytes. (C) Immunoglobulin light chain lambda (left) and kappa (right) repertoire of sorted human B cells. (D) Immunoglobulin light chain lambda (left) and kappa (right) repertoire of sorted mouse B cells.

**A**

```

IbpA full length 1 AEAPAEETVQEPGAGAVGADVTYKFDERGNV I DEKNLSF-----DE-----GIYNYEMLDQYLPAGYERKSMGDFHALQGAV----I EVRVMQKAPVEEVQNVKINYYDEAA 99
IbpB full length 1 AEPVEKVTESDSWDS I SGEI NFRD TDNNE I FVQFNNEKVEDYRWGDDPKDTEYVLP AETVKKYLPEGYELV-EGIYSVAGGETQDSYFVYAEVKKLVLEETQDVVKINYYDEAA 114
-----
IbpA full 100 GKQVAEVPVQVSSNASVVDMA I LTRYLPAGYTL EGSDC I IRDGYVYVSVAPAEVQNVK I NYDEAAKQVAEVPVQVSI DTSYVDMA I LTRYLP EGYTLEGSDC I IRDGYVYVSS 214
IbpB full 115 GKQVAEVPVQVSI DTSYVDMA I LTRYLP EGYTLEGSDC I IRDGYVYVSVAPAEVQNVK I NYDEAAKQVAEVPVQVSI DTSYVDMA I LTRYLP EGYTLEGSDC I IRDGYVYVSS 229
-----
IbpA full 215 VAPAEVQNVK I NYDEAAKQVAEVPVQVSI DTSYVDMA I LTRYLP EGYTLEGSDC I IRDGYVYVSVAPAEVQNVK I NYDEAAKQVAEVPVQVSI DTSYVDMA I LTRYLP E 329
IbpB full 230 VAPAEVQNVK I NYDEAAKQVAEVPVQVSI DTSYVDMA I LTRYLP EGYTLEGSDC I IRDGYVYVSVAPAEVQNVK I NYDEAAKQVAEVPVQVSI DTSYVDMA I LTRYLP E 344
IbpA truncated 1 -----APAEVQNVK I NYDEAAKQVAEVPVQVSI DTSYVDMA I LTRYLP E 47
-----
IbpA full 330 GYALVSSDC I IRDGYVYVSVKQDVE I REAVLHIT FETPNGEVVT TETVTAEGADGEDAVFR LGVDFNLP TGKLSNDRDQVTE I T I P FGSTGGHTMVVEKGDLS I VK I QFVDAE 444
IbpB full 345 GYALVSSDC I IRDGYVYVSVKQDVE I REAVLHIT FETPNGEVVT TETVTAEGADGEDAVFR LGVDFNLP TGKLSNDRDQVTE I T I P FGSTGGHTMVVEKGDLS I VK I QFVDAE 459
IbpA truncated 48 GYALVSSDC I IRDGYVYVSVKQDVE I REAVLHIT FETPNGEVVT TETVTAEGADGEDAVFR LGVDFNLP TGKLSNDRDQVTE I T I P FGSTGGHTMVVEKGDLS I VK I QFVDAE 162
-----
IbpA full 445 NNDEVVAGGDY FVDGDDGI FHTRE I TEWVP EGYELQEVGDFV ELYKETP LQLSVTK I KEDKPE TDP EEPNK --- P EDPDKEDTNNKDDKEDTKKEDKKNSPKTGDETSAA 556
IbpB full 460 NNDEVVAGGDY FVDGDDGI FHTRE I TEWVP EGYELQEVGDFV ELYKETP LQLSVTK I KEDKPE TDP EEPNK EKP EDPDKEDTNNKDDKEDTKKEDKKNSPKTGDETSAA 574
IbpA truncated 163 NNDEVVAGGDY FVDGDDGI FHTRE I TEWVP EGYELQEVGDFV ELYKETP LQLSVTK I KEDKPE TDP EEPNK --- P EDPDKEDTNNKDDKEDTKKEDKKNSPKTGDETSAA 274
-----
IbpA full 557 AAALPAGVSLAAI LAVLVKKFK 578
IbpB full 575 AAALPAGVSLAAI LAVLVKKFK 596
IbpA truncated 275 AAALPAGVSLAAI LAVLVKKFK 296

```

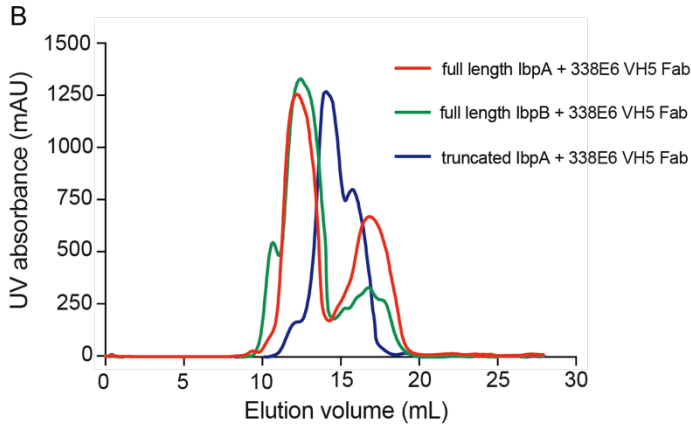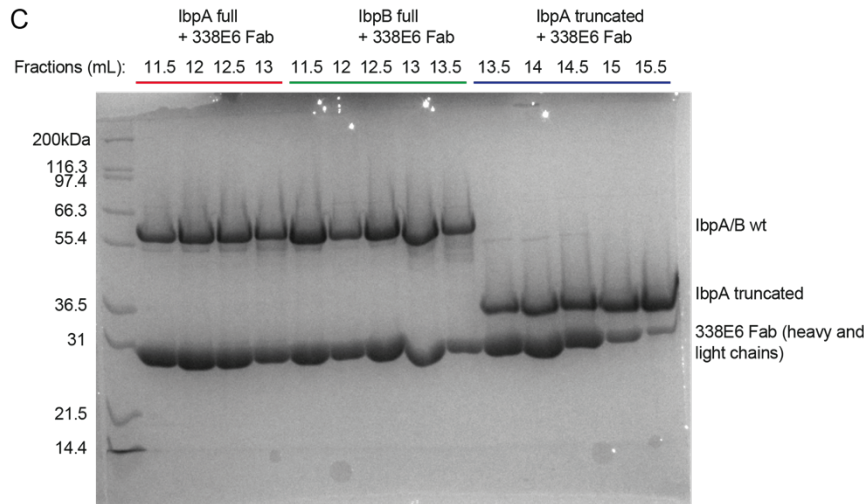

**Supplement Figure 2.** (A) Amino acid sequence alignment for full length IbpA, B and truncated IbpA. Red highlighting marks conserved residues. (B) Size exclusion chromatography profile of full length IbpA, B or truncated IbpA in complex with mouse 338E6 VH5 Fab. (C) Reduced SDS-PAGE size exclusion fractions of full length IbpA, B and truncated IbpA complexes with mouse 338E6 VH5 Fab.

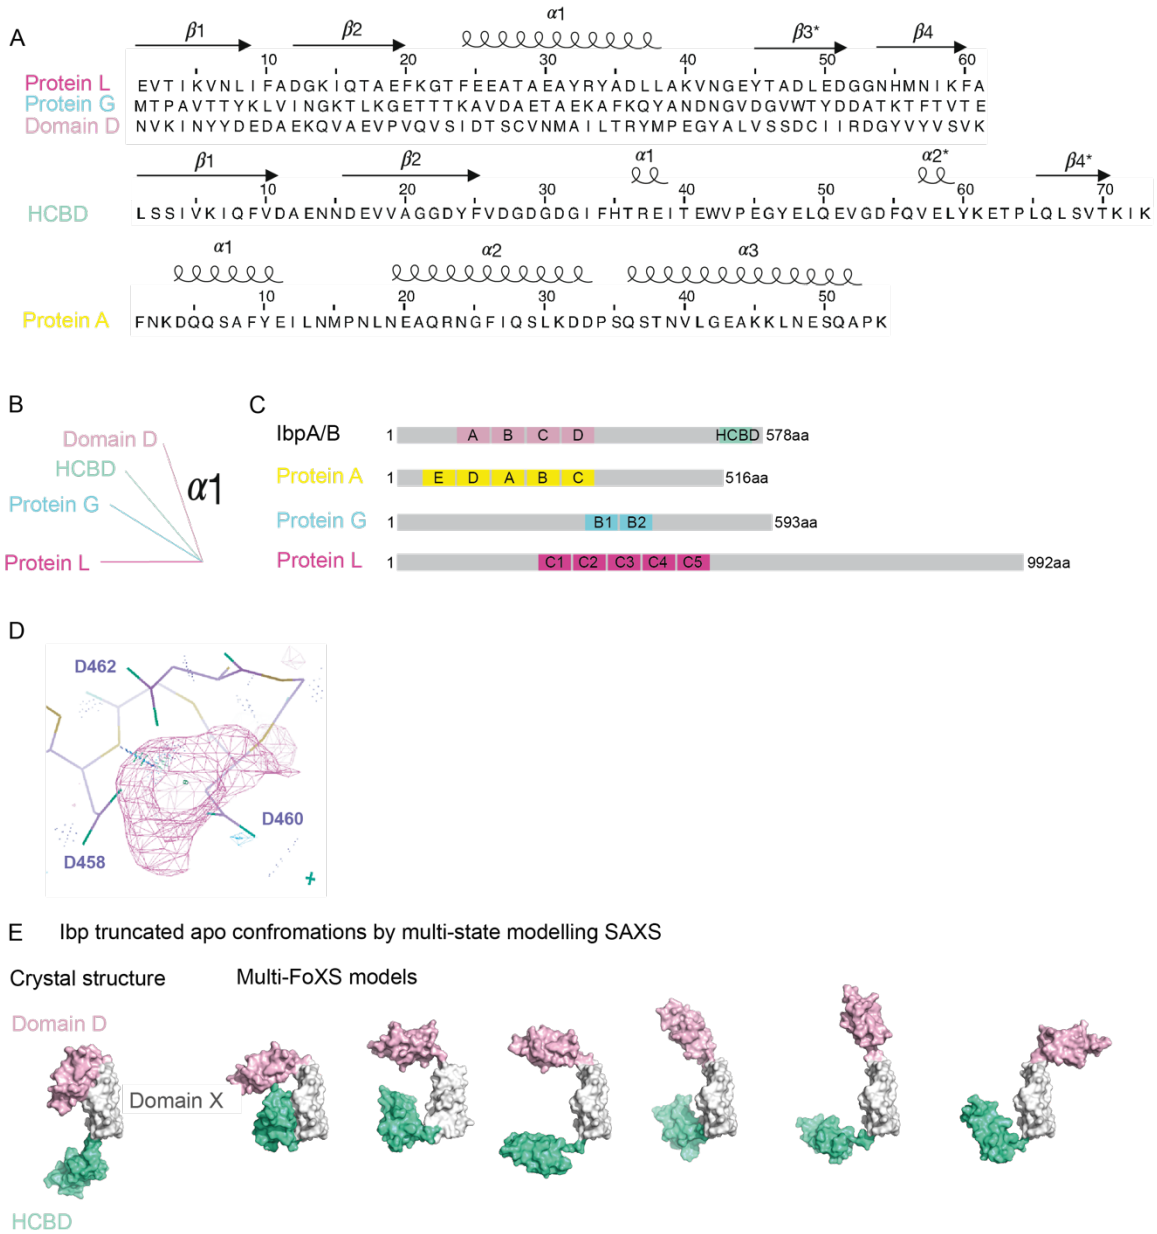

**Supplement Figure 3.** (A) Amino acid sequence alignment and secondary structure annotations of individual repeat domains from Protein L (magenta), Protein G (cyan) and Domain D (lightpink), HCBd (greenteal) and from Protein A (yellow). (B) Schematic of relative positioning of alpha helices in Domain D, HCBd, Protein G and L. (C) Cartoon representation of repeat regions in full length sequence of superantigens Protein A, G and L in comparison with IbpA/B. (D) Metal ion binding site by a DGDGDG motif in HCBd. (E) IbpA truncated apo conformations determined by multi-state modelling by SAXS.



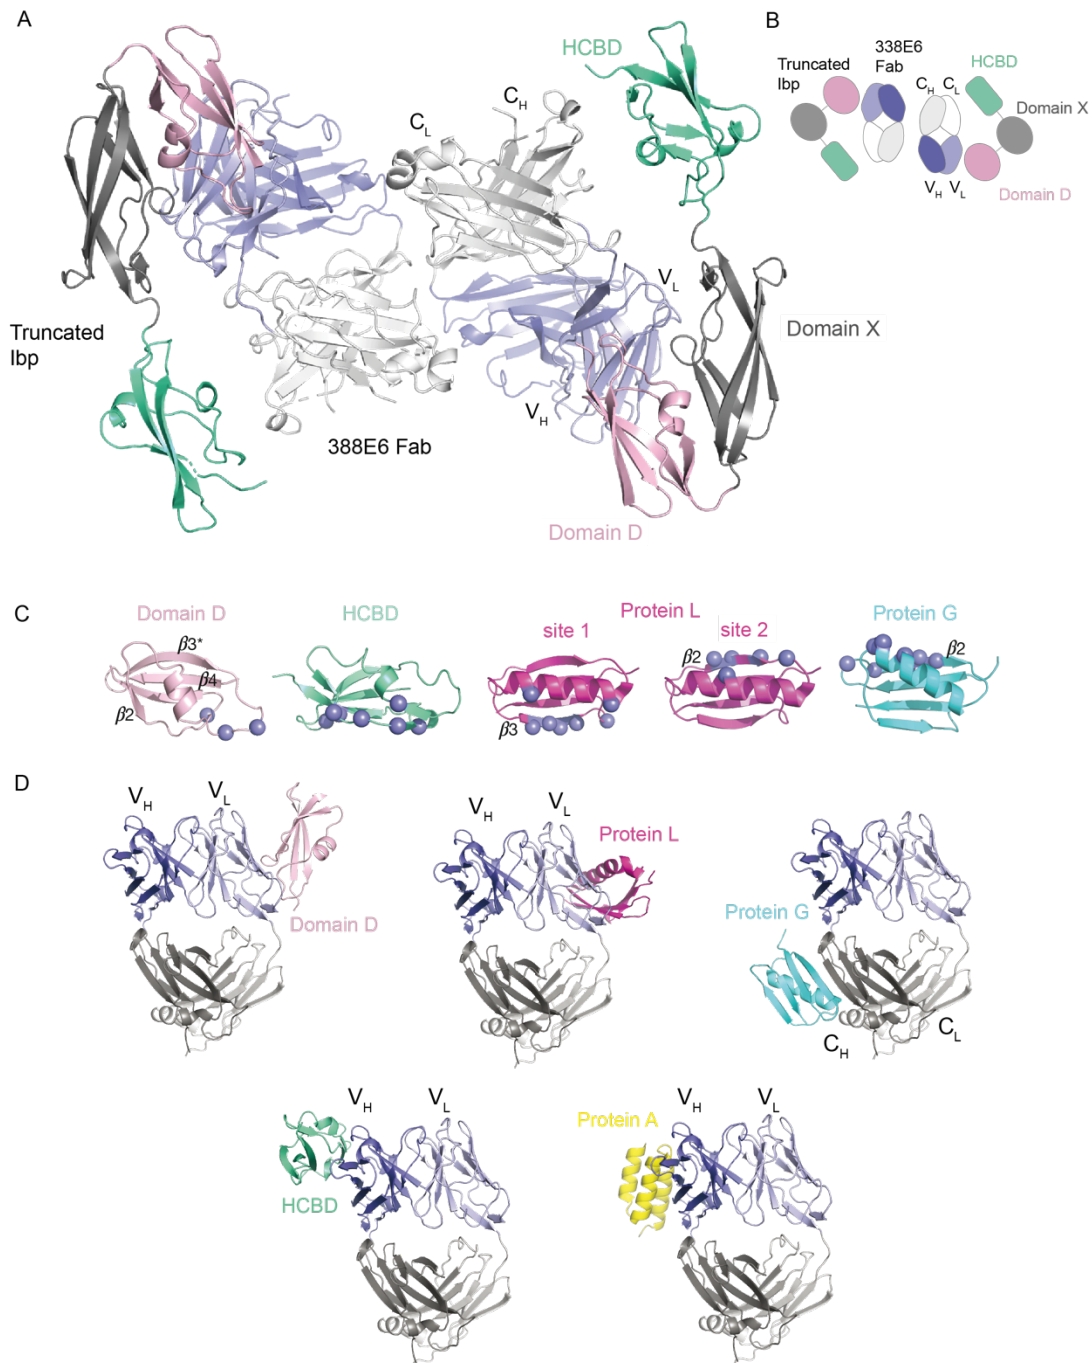

**Supplement Figure 4.** (A) Asymmetric unit of the complex crystal structure. (B) Cartoon representation of asymmetric unit. (C) Structures and binding interface of superantigen-like folds of lbp Domain D and HCBD in comparison with Protein L and G. Spheres represent  $C_\alpha$  of interacting residues. (D) Crystal structures show docking sites and superantigens bound to Fab fragments: lbpA Domain D (top left), Protein L (top middle), Protein G (top right), lbpA HCBD (bottom left) and Protein A (bottom right).

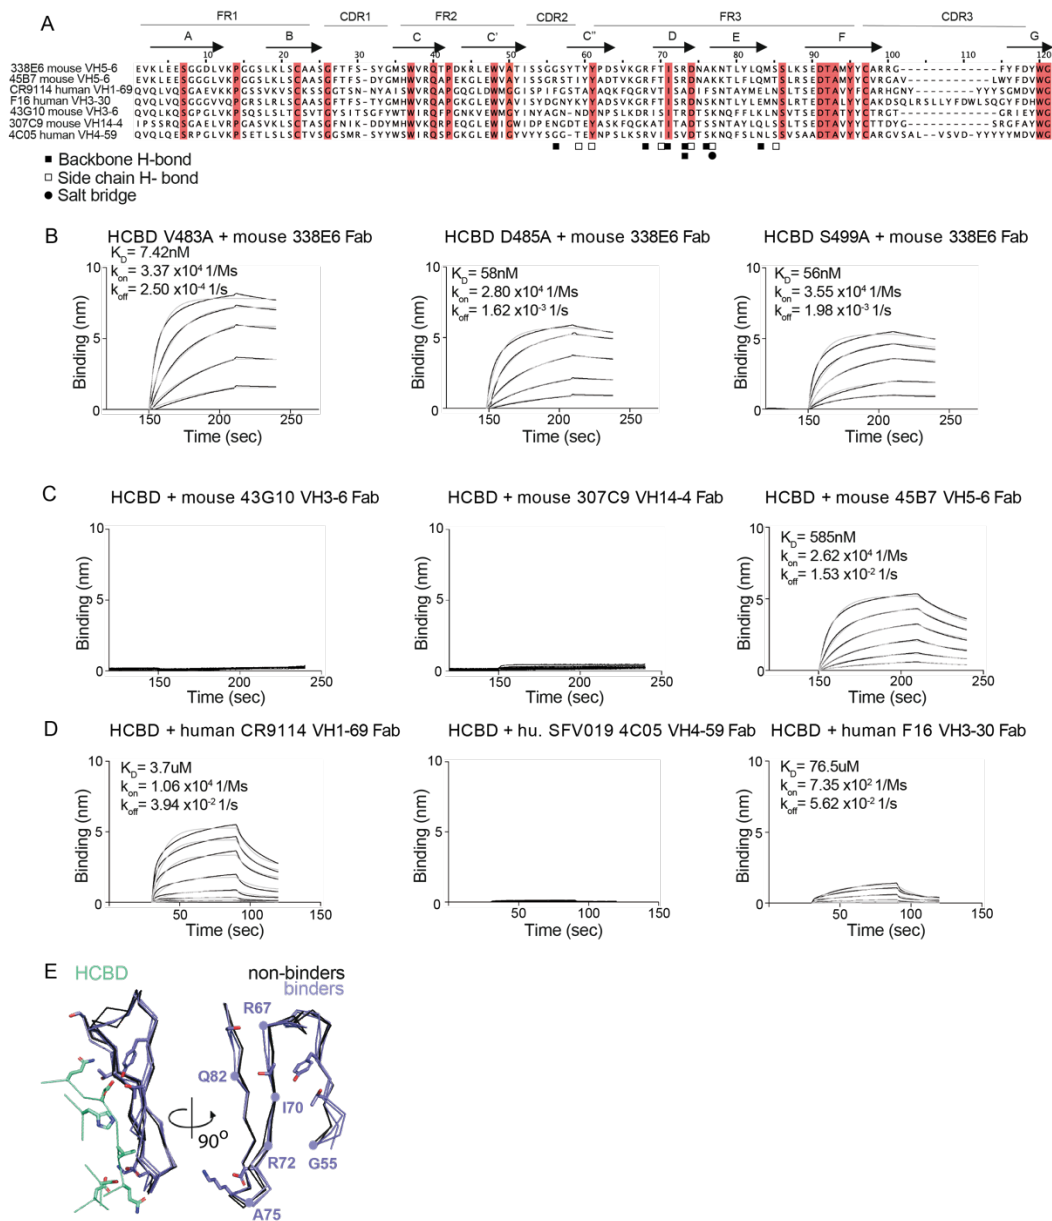

**Supplement Figure 5.** (A) Sequence alignment of analyzed mouse and human VH germlines and comparison between interacting residues from mouse 338E6 VH5 Fab from structure. Secondary structures, loop regions and interacting residues are marked accordingly. Participating residues are marked according to the legend below. Red highlighting marks conserved residues. (B) Example binding plots and affinities to 338E6 Fab of alanine mutants compared with wild type HCBD. (C) Example binding plots between wild-type HCBD and different mouse VH germlines. (D) Example binding plots between wild-type HCBD and different human VH germlines. (E) Ribbon representation of selected structures of binding (slate) and non-binding (black) VH families to HCBD (greenteal); highlighted are interacting residues: backbone (slate circles and names of residues) and side chains (right).

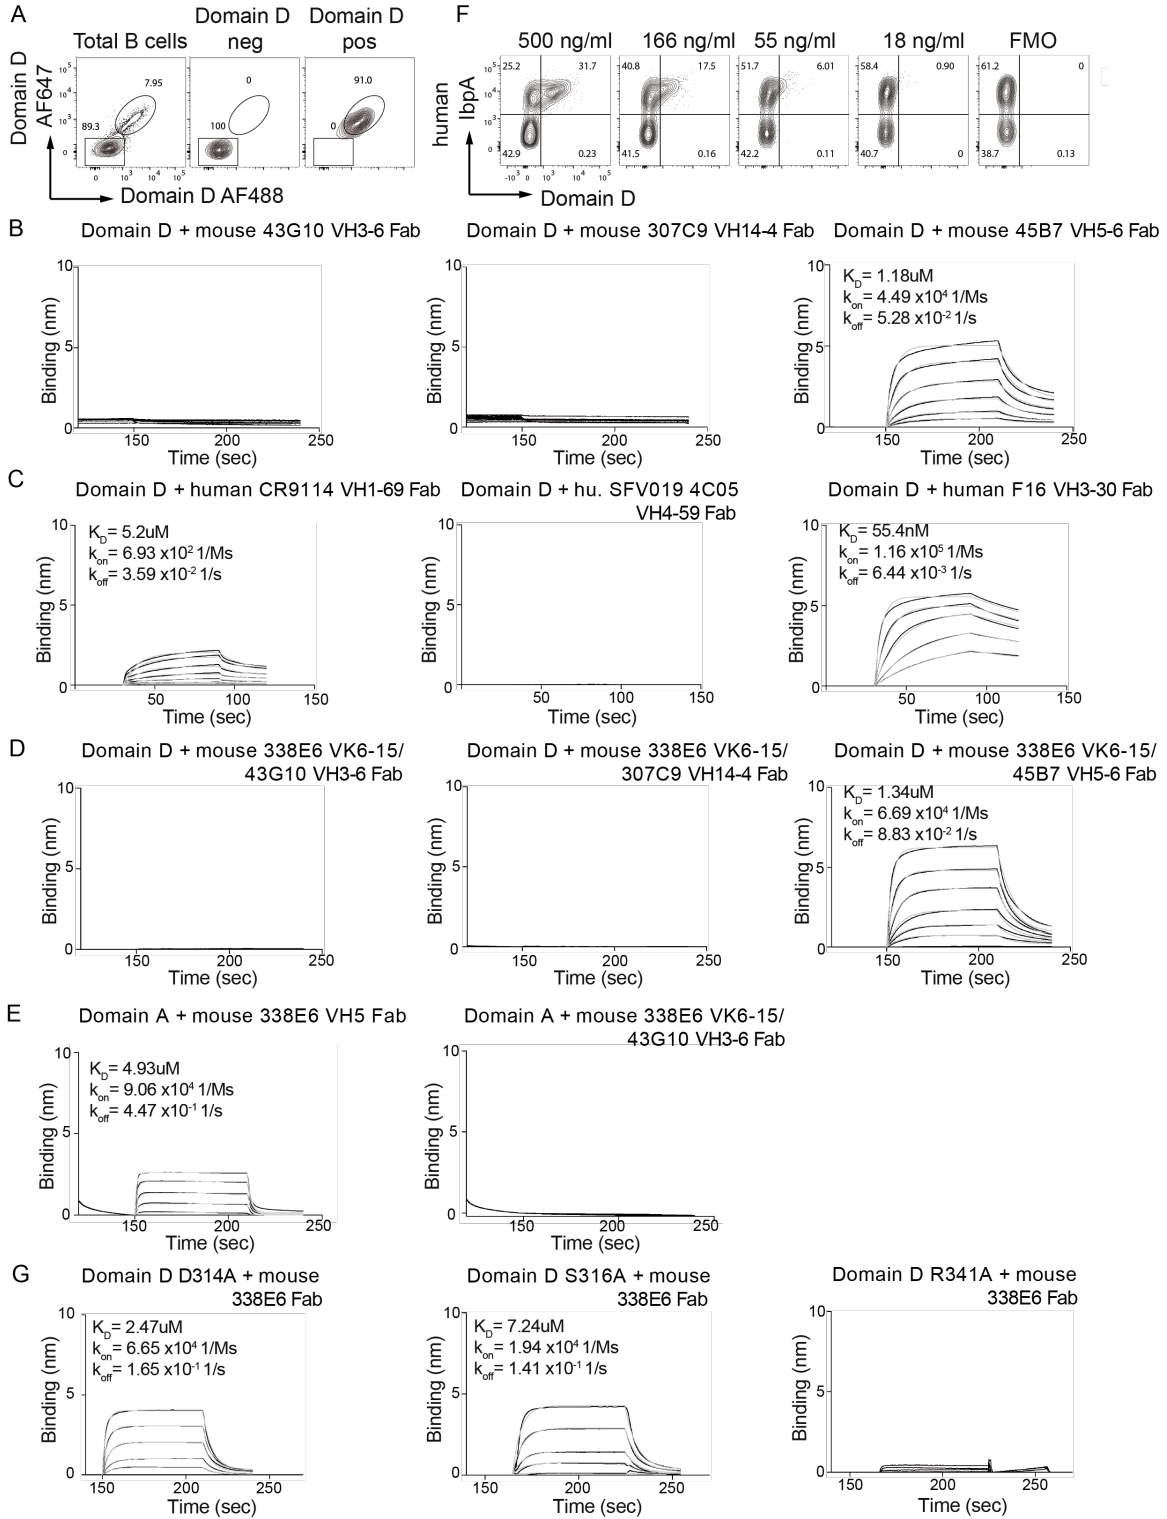

**Supplement Figure 6.** (A) Flow cytometry of sorted Domain D negative and positive B cells used for heavy chain repertoire analysis. (B) Example binding plots between wild-type Domain D and different mouse VH germlines. (C) Example binding plots between wild-type Domain D and different human VH germlines. (D) Example binding plots between wild-type Domain D and mouse fixed VK6-15 and swapped VH germlines. (E) Example binding plots between wild-type Domain A and mouse 338E6 VH5 Fab or hybrid Fab (338E6 Vk6-15 paired with 43G10 VH3 chain). (F) Human PBMCs were stained with IbpA-AF647 at 166ng/ml and Domain D-AF488 titrated as indicated above representative contour plots. (G) BLI plots of binding between three different alanine substitutions in Domain D interface and mouse 338E6 VH5 Fab.

**A IbpA full + mouse 338E6 VH5 Fab complex**

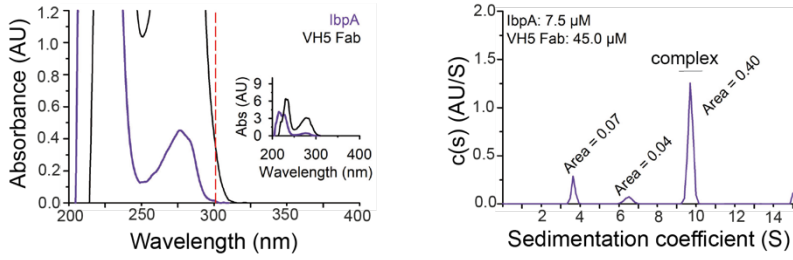

**B IbpA trunc. + mouse 338E6 VH5 Fab complex**

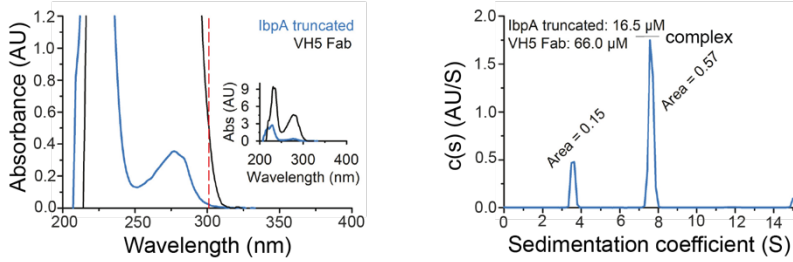

**C Experimental molecular weight calculations from AUC**

| Protein/ Complex      | $S_{20,w}$ | $f/f_0$ | $MW_{exp}$ (kDa) | $MW_{seq}$ (kDa) |
|-----------------------|------------|---------|------------------|------------------|
| IbpA full wt          | 2.81       | 2.13    | 67.0             | 61.3             |
| IbpA trunc. wt        | 2.11       | 1.81    | 33.8             | 30.5             |
| 338E6 Fab             | 3.57       | 1.42    | 50.4             | 50.6             |
| IbpA full+338E6 Fab   | 9.0        | 1.9     | ~343             | 314.3            |
| IbpA trunc.+338E6 Fab | 7.2        | 1.58    | ~190             | 182.3            |
| F16 Fab               | 3.6        | 1.32    | 47.2             | 50.2             |
| IbpA full + F16 Fab   | N/A        | N/A     |                  |                  |
| IbpA trunc.+ F16 Fab  | 4.0        | 1.32    | 78.4             | 80.7             |

**D IbpA full length apo**

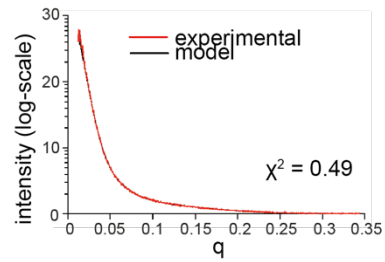

**E Ibp truncated apo conformations by multi-state modelling SAXS**

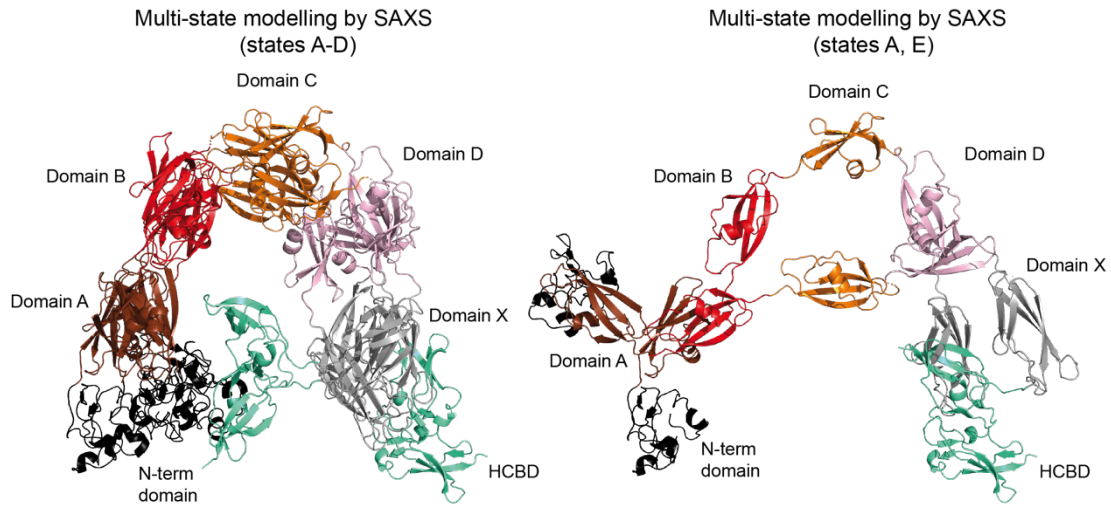

**Supplement Figure 7.** (A) Absorbance spectrum of full length IbpA and mouse 338E6 VH5 Fab at the concentrations loaded in the AUC experiment (left). The inset shows the full range of absorbance along the Y-axis. A red dashed line marks the wavelength (301 nm) used in the AUC experiment shown (right). (B) Absorbance spectrum of truncated IbpA and mouse 338E6 VH5 Fab at the concentrations loaded in the AUC experiment (left). The inset shows the full range of absorbance along the Y-axis. A red dashed line marks the wavelength (301 nm) used in the AUC experiment shown (right). (C) Table of experimental molecular weight calculations of IbpA constructs apo and in complex with mouse 338E6 VH5 Fab from AUC. (D) Experimental fit of SAXS data of full length IbpA apo analyzed by multi-state modelling with MultiFoXS and plotted by  $I(q)$ . (E) Apo models of full-length IbpA based on SAXS data; states A-D are in similar conformations (left), distinct state E in comparison to state A (right).

**Supplement Table 1.** Data collection and refinement statistics of truncated IbpA + mouse 338E6 VH5 Fab complex.

|                                | 338E6 VH5 Fab + IbpA 283-578aa      |
|--------------------------------|-------------------------------------|
| Wavelength energy (keV)        | 12.68                               |
| Wavelength range (Å)           | 0.98                                |
| Resolution range               | 76.59 - 2.102 (2.177 - 2.102)       |
| Space group                    | P 1 21 1                            |
| Unit cell                      | 85.2401 102.191 118.28 90 102.05 90 |
| Total reflections              | 3855863 (373296)                    |
| Unique reflections             | 115284 (11391)                      |
| Multiplicity                   | 33.4 (32.5)                         |
| Completeness (%)               | 99.10 (98.16)                       |
| Mean I/sigma(I)                | 21.03 (1.12)                        |
| Wilson B-factor                | 34.94                               |
| R-merge                        | 0.6793 (3.98)                       |
| R-meas                         | 0.6898 (4.046)                      |
| R-pim                          | 0.1178 (0.7122)                     |
| CC1/2                          | 0.971 (0.307)                       |
| CC*                            | 0.993 (0.686)                       |
| Reflections used in refinement | 114342 (11300)                      |
| Reflections used for R-free    | 1997 (198)                          |
| R-work                         | 0.2297 (0.3517)                     |
| R-free                         | 0.2658 (0.3975)                     |
| CC(work)                       | 0.840 (0.394)                       |
| CC(free)                       | 0.821 (0.352)                       |
| Number of non-hydrogen atoms   | 9999                                |
| macromolecules                 | 9724                                |
| ligands                        | 2                                   |
| solvent                        | 273                                 |
| Protein residues               | 1265                                |
| RMS(bonds)                     | 0.008                               |
| RMS(angles)                    | 1.04                                |
| Ramachandran favored (%)       | 95.58                               |
| Ramachandran allowed (%)       | 4.02                                |
| Ramachandran outliers (%)      | 0.4                                 |
| Rotamer outliers (%)           | 5.83                                |
| Clashscore                     | 7.33                                |
| Average B-factor               | 48.71                               |
| macromolecules                 | 48.97                               |
| ligands                        | 41.6                                |
| solvent                        | 39.36                               |
| Number of TLS groups           | 1                                   |

(Statistics for the highest-resolution shell are shown in parentheses.)

**Supplement Table 2.** Contact residues between individual HCBD, Domain D and **Domain X** of truncated lbpA and mouse 338E6 VH5 Fab

**Contact residues between lbpA truncated (HCBD, Domain D and middle Domain X) and 338E6 Fab**

| <u>338E6 Fab Heavy chain</u> | <u>HCBD</u>            | <u>Contact</u> |
|------------------------------|------------------------|----------------|
| Ile51                        | Val483, Gly484         | vdW            |
| Gly55 O                      | Val483 N               | H***           |
| Gly55                        | His466, Val483         | vdW            |
| Thr58 OG1                    | Asp485 OD2             | H***           |
| Thr58                        | Asp485                 | vdW            |
| Tyr60 OH                     | Asp485 OD2             | H***           |
| Tyr60                        | Asp485                 | vdW            |
| Gly66                        | Ile464                 | vdW            |
| Arg67 O                      | Gln487 NE2             | H***           |
| Arg67                        | Gln487                 | vdW            |
| Phe68                        | Gln487                 | vdW            |
| Thr69 OG1                    | Gln487 NE2             | H***           |
| Thr69                        | Ile464, Asp485, Gln487 | vdW            |
| Ile70 O                      | Asp485 N               | H***           |
| Ile70                        | Asp485                 | vdW            |
| Ser71                        | Val483, Asp485, Phe486 | vdW            |
| Arg72 N                      | Val483 O               | H***           |
| Arg72 O                      | Glu482 CA              | H*             |
|                              | Val483 N               | H***           |
| Arg72                        | Glu482, Val483         | vdW            |
| Asp73 OD1                    | Ser499 OG              | H*             |
| OD2                          | Ser499 OG              | H***           |
| Asp73                        | Glu482, Ser499         | vdW            |
| Asn74                        | Gln481, Glu482         | vdW            |
| Ala75 N                      | Gln481 OE1             | H*             |
| Ala75                        | Ala443, Gln481         | vdW            |
| Lys76 NZ                     | Asp447 OD2             | SB             |
| Lys76 NZ                     | Asp447 OD2             | H***           |
| Lys76                        | Asp447                 | vdW            |
| Gln82 O                      | Gln487 NE2             | H*             |
| Gln82                        | Gln487, Leu490         | vdW            |
| Ser84 OG                     | Gln487 OE1             | H***           |
| Ser84                        | Gln487                 | vdW            |
| <u>338E6 Fab Light chain</u> | <u>Domain D</u>        | <u>Contact</u> |
| Ser7                         | Asp342                 | vdW            |
| Met11                        | Ser316                 | vdW            |
| Ser12                        | Asp314                 | vdW            |
| Val19                        | Ser316                 | vdW            |
| Ser20 N                      | Ser316 OG              | H***           |
| Ser20                        | Ser316, Ile339         | vdW            |
| Thr22                        | Ile340                 | vdW            |
| Asp70                        | Arg341                 | vdW            |
| Phe71 O                      | Arg341 NH1             | H*             |
| Phe71                        | Arg341                 | vdW            |
| Thr72 OG1                    | Arg341 NH1             | H***           |
|                              | NH2                    | H***           |
| Thr72                        | Ile339, Arg341         | vdW            |
| Lys107 NZ                    | Asp314 OD2             | SB             |
| Lys107 CD                    | Asp314 OD2             | H*             |
| Lys107 CE                    | Asp314 OD2             | H*             |
| Lys107                       | Asp314                 | vdW            |
| <u>338E6 Fab Light chain</u> | <u>middle Domain X</u> | <u>Contact</u> |
| Asp60                        | Asp408                 | vdW            |
| Ser76                        | Thr411                 | vdW            |
| Asn77                        | Leu403                 | vdW            |

vdW: van der Waal contact (distance < 4 Å);

H: hydrogen bond (distance < 3.4 Å, \*\*\* and \* denote high and low possibilities for bond formation);

SB: salt bridge (distance > 3.4 and < 4.5 Å, polar interaction between oppositely charged atoms).
